# Supplementary material for: Overexpression of a Novel ERF-X-Type Transcription Factor, OsERF106MZ, Reduces Shoot Growth and Tolerance to Salinity Stress in Rice
Source: PubMed Central journal article supplement (PMC8452809; doi:10.1186/s12284-021-00525-5), 2021-09-20
Supplement: 12284_2021_525_MOESM1_ESM.pdf [file 12284_2021_525_MOESM1_ESM.pdf]

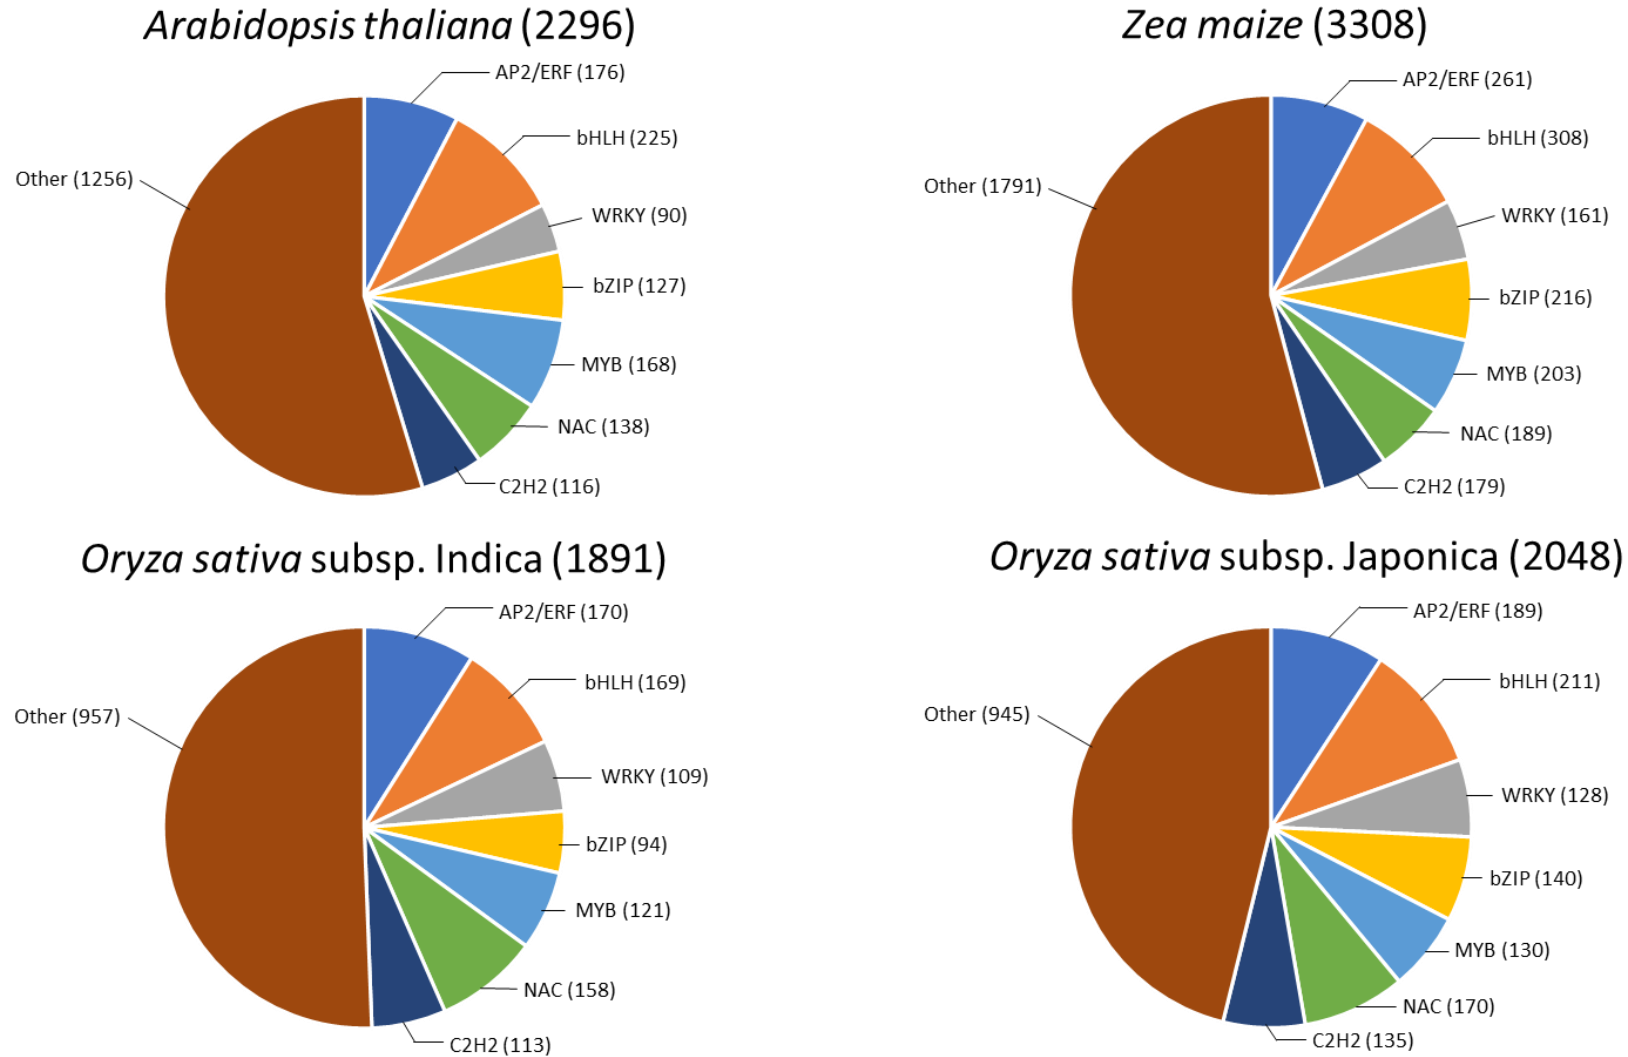

**Figure S1** The number of transcription factors in the AP2/ERF, bHLH, WRKY, bZIP, MYB, NAC, C2H2, and other families in *Arabidopsis*, maize, *indica* rice, and *japonica* rice. The data were retrieved from the PlantTFDB v5.0 website (<http://planttfdb.cbi.pku.edu.cn/>).

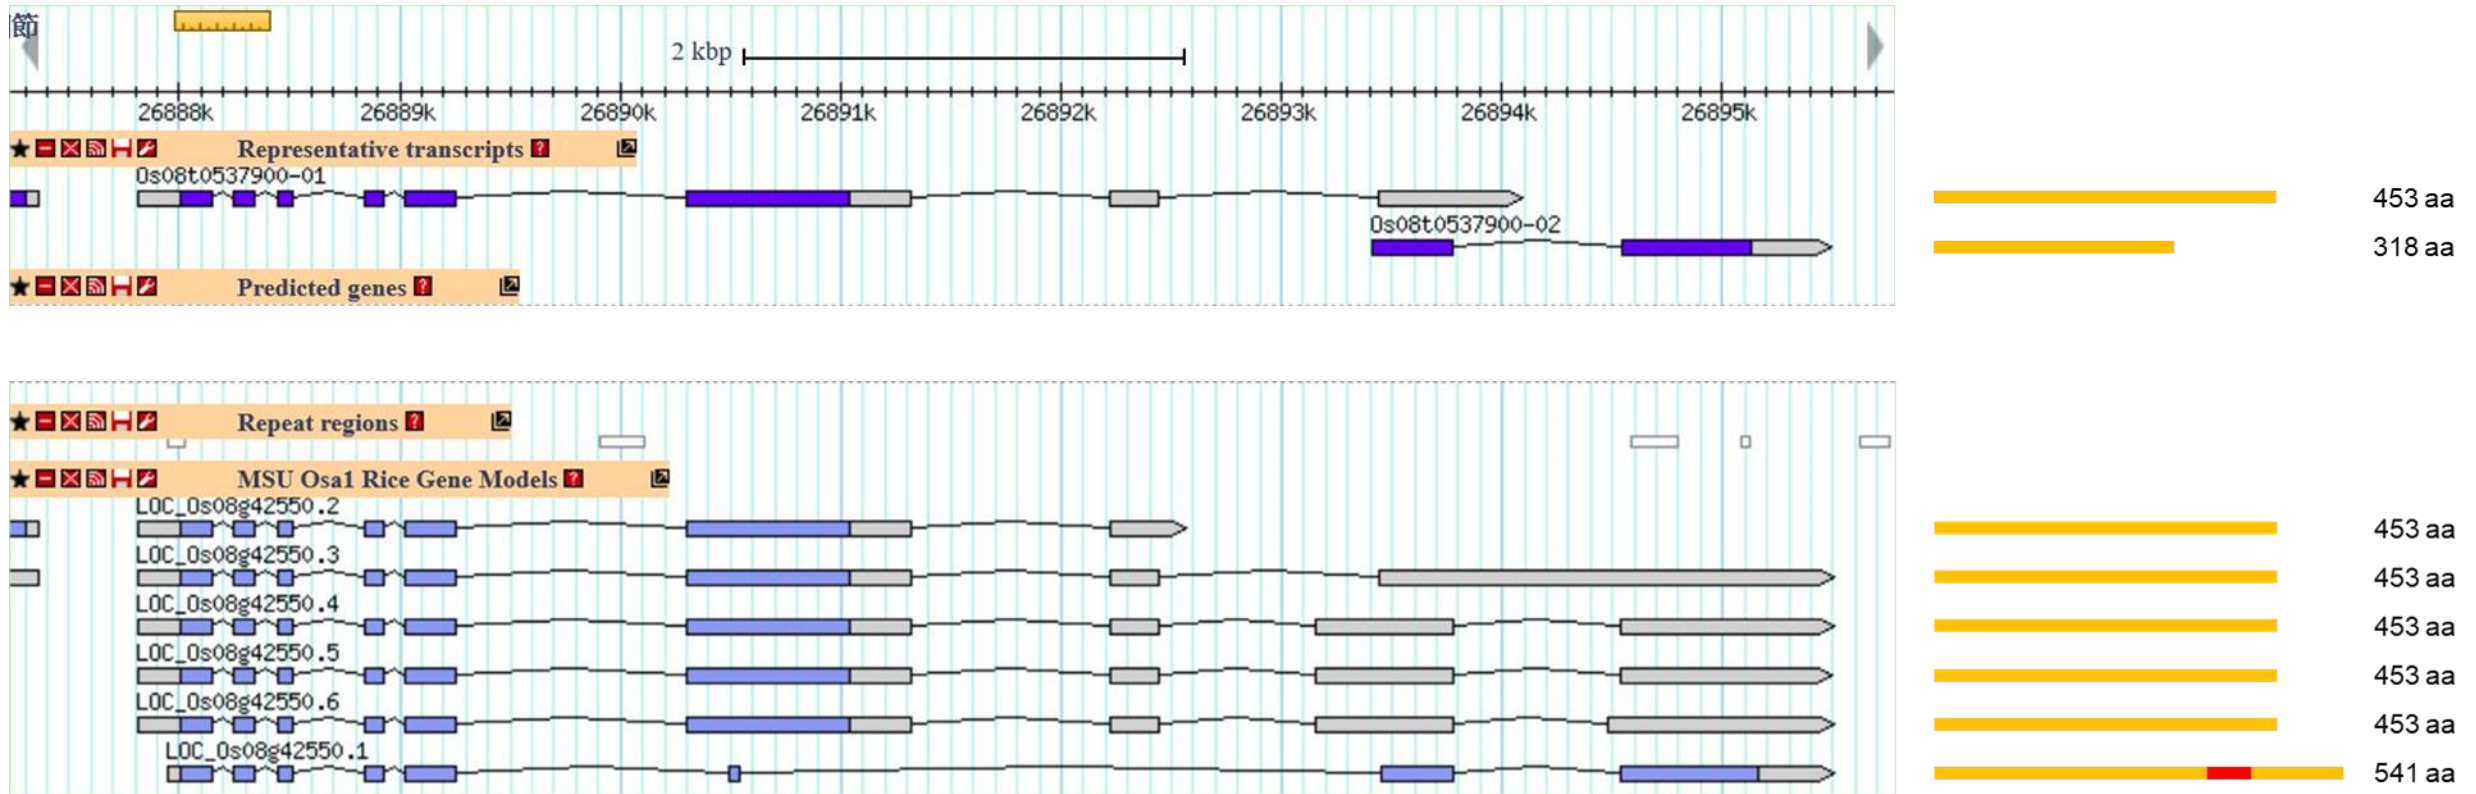

**Figure S2** Structural comparison of putative OsERF106-encoding transcripts between the Rice Annotation Project Database (RAP-DB, <http://rapdb.dna.affrc.go.jp/>) and the Michigan State University Rice Genome Annotation Project (MSU RGAP, <http://rice.plantbiology.msu.edu/>). The coding sequences of two *Os08t0537900* transcripts (upper panel) and six *Os08g42550* transcripts (lower panel) were documented on the RAP-DB and MSU RGAP websites, respectively. One typical AP2/EREBP domain (red bar) is present in the *Os08g42550.1*-encoded protein. The ScanProsite tool of ExPASy (<http://www.expasy.org/>) was used to retrieve the AP2/EREBP domain.

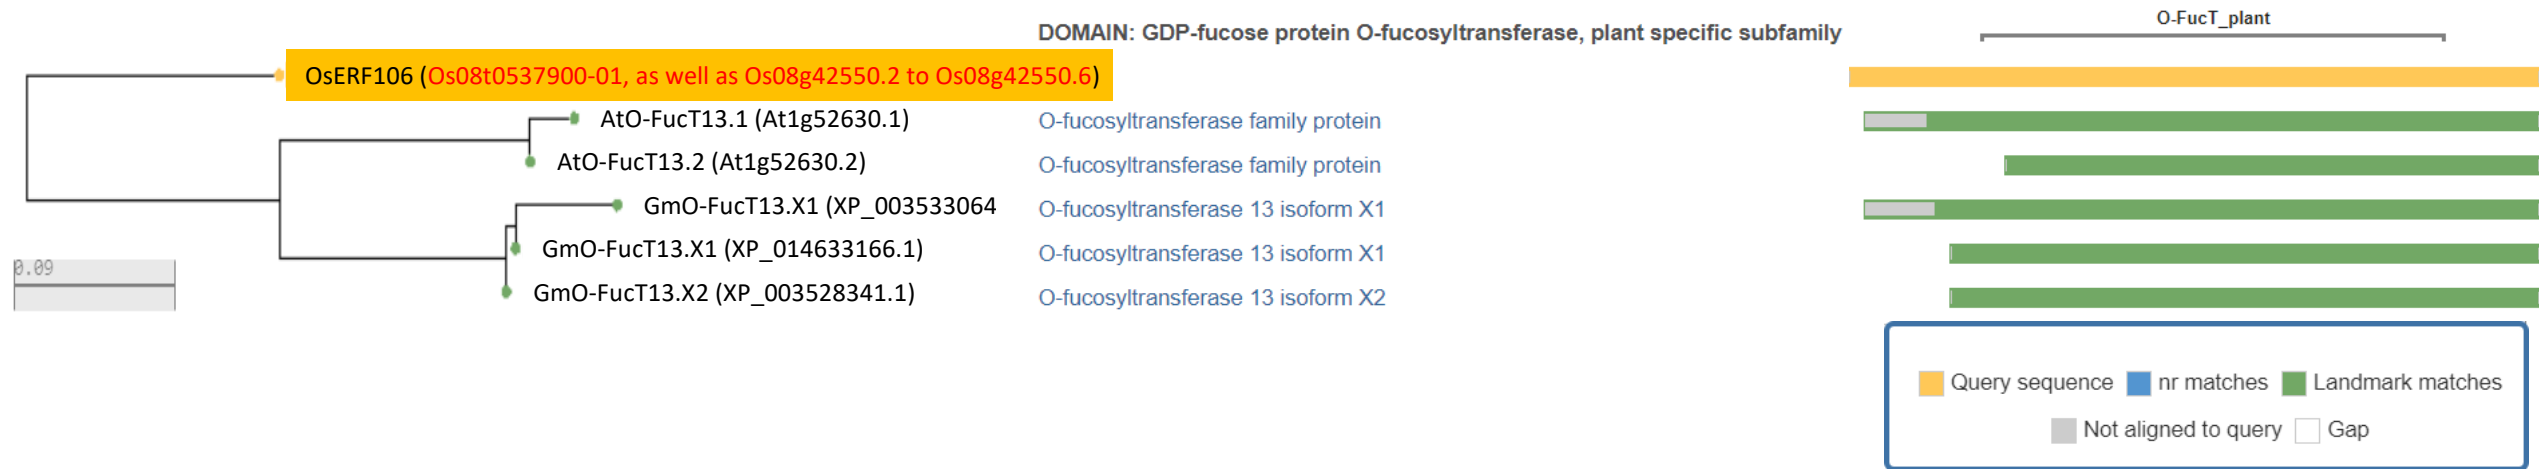

**Figure S3** Os08t0537900-01 and Os08g42550.2 to Os08g42550.6 encode an O-fucosyltransferase (O-FucT) without the AP2/EREBP domain. The data were analyzed with NCBI SmartBLAST (<http://blast.ncbi.nlm.nih.gov/smartblast/>).

CDS

957 bp

```
>Os08t0537900-02 Hypothetical conserved gene.  
ATCAGTTACTCCTCTTACCAGTGCAGCTCTGCATCGTCAGCGATCAAGGGTACCAGGGTG  
GATCGCCTACGAGAAGCTAGTGACACAGGGCATCATCGTGGTCGGCACAAGAGGGCCCGC  
TCCTCTCCTCCACGCCATGACGACGAGCCGCCACCGCCGCCGCGCTGTCTCCGGCGGTG  
ACAGGAGGAGCACACGGCGGCCGCGTGGCACTCAACGGTGCTCGCGGAGGACGTGAA  
AGTGCCGTCATCGTCGCGGCGCTGACGCACGTCATCAGCTCCACGGCGGCGGAGGTGACC  
ACGGCCGTTCCCTCCGGTGACGGTTGCGCCGACGAGCTGCCACGGCTACCATGTTCCGA  
CAGCAAGCCGCCGCGCGGCTTTCCTCCTCTGCCGTCGTCGAGCGGATCAGCagcgaaggc  
gccggagcagcagcagccacggcggcggcgtaccgcgggcgtgcggcagcggccgtgggggaa  
gtgggocggcggagatccgcgacccggggaaggcggcggcgggtgtggctcggcaccttcga  
caccgccgaggacgccgcccgcgctaagcgcggccgcccgtccgcttcaagggtccaa  
ggccaagggtcaacttcccCGACGAAGTCGCCGGCGCCAGCATCGCCGCCGTCCAGCTGCC  
ACGCCATCATCAACACCACCCCCAACGTCACTGCCGCGCTGCCGGTGCCGGCGCATCT  
GAGGCCACACTTCAGCCTCGCCGGCGGCCAGAGCACACCGGCGCCCGCAGCCGCCGC  
CGTCGCCGCTCCGCCGCGGGAGGAGTTCCCCGACCTCAGCAGCTACGCGCACATACTGCA  
GAGCGGCGACCTGGAGTACGACTTCCACGCCGCGGTTTCTGCCGGACTAACGACGACAGC  
TGGGCGAtcgtcgtcgtcgtcgtcattgtcgatgccgccgcatccgagGATCTTGA
```

**Figure S4** The coding sequence (CDS) of Os08t0537900-02 lacks an ATG-start codon. The image was taken from the Rice Annotation Project Database (RAP-DB, <http://rapdb.dna.affrc.go.jp/>).

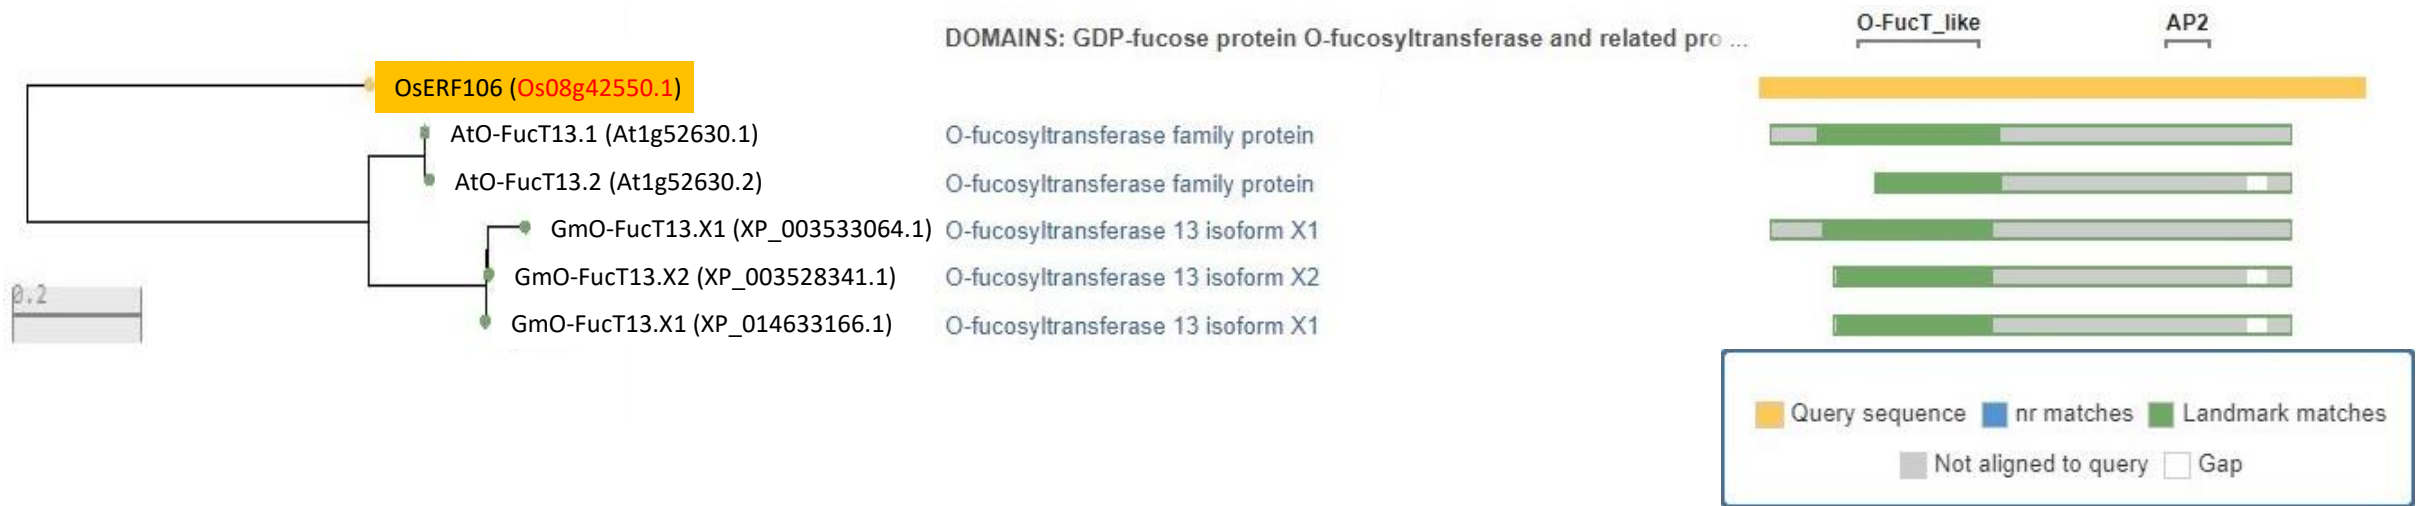

**Figure S5** Os08g42550.1 encodes an AP2/EREBP domain-containing O-fucosyltransferase (O-FucT)-like protein, which is homologous to AtO-FucT13 and GmO-FucT13 but not to any AtAP2/ERFs or GmAP2/ERFs. The data were analyzed with NCBI SmartBLAST (<http://blast.ncbi.nlm.nih.gov/smartblast/>).

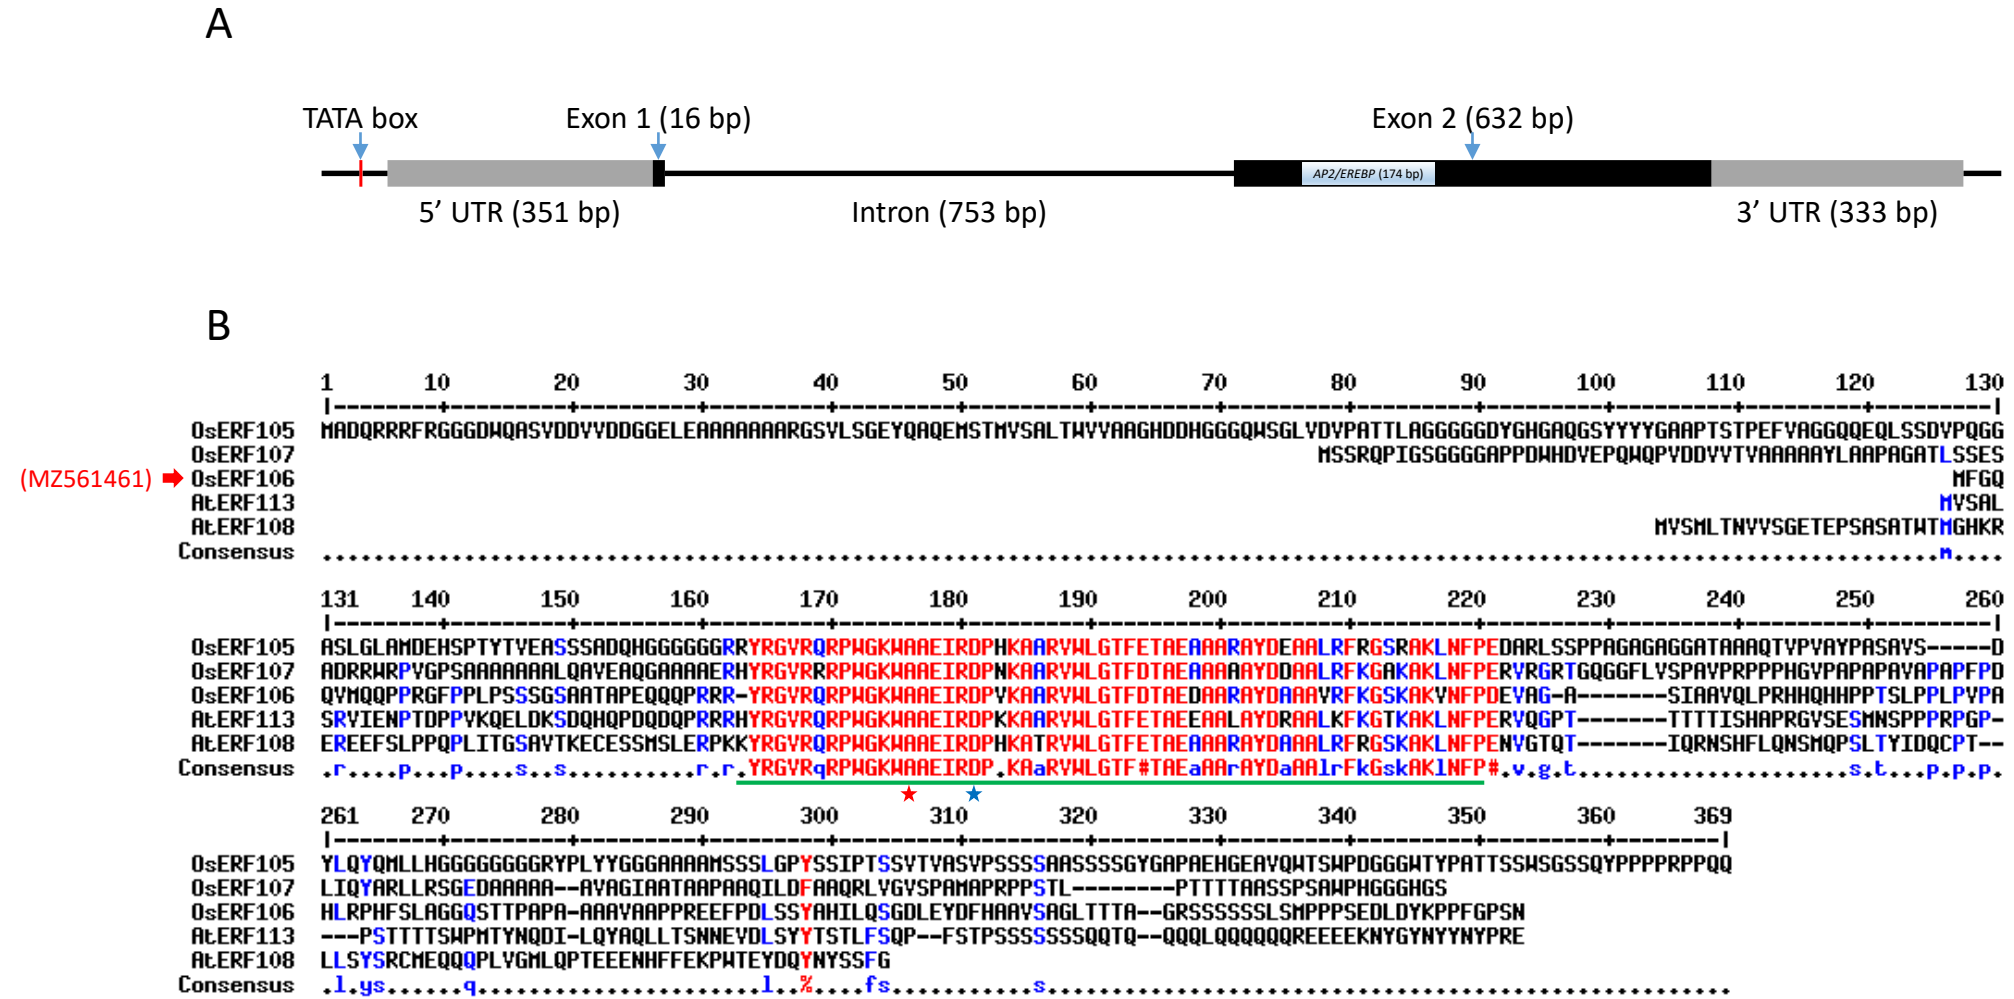

**Figure S6** Gene structure and amino acid sequence alignment of OsERF106MZ (GenBank accession No. MZ561461). (A) Structure of *OsERF106MZ*. (B) Amino acid sequence alignment of OsERF105, OsERF106MZ, and OsERF107 together with their homologs, AtERF108 and AtERF113. The predicted AP2/ERE BP domain is underlined in green. The conserved alanine 14 and aspartic acid 19 residues of the AP2/ERE BP domain are indicated with red and blue asterisks, respectively.

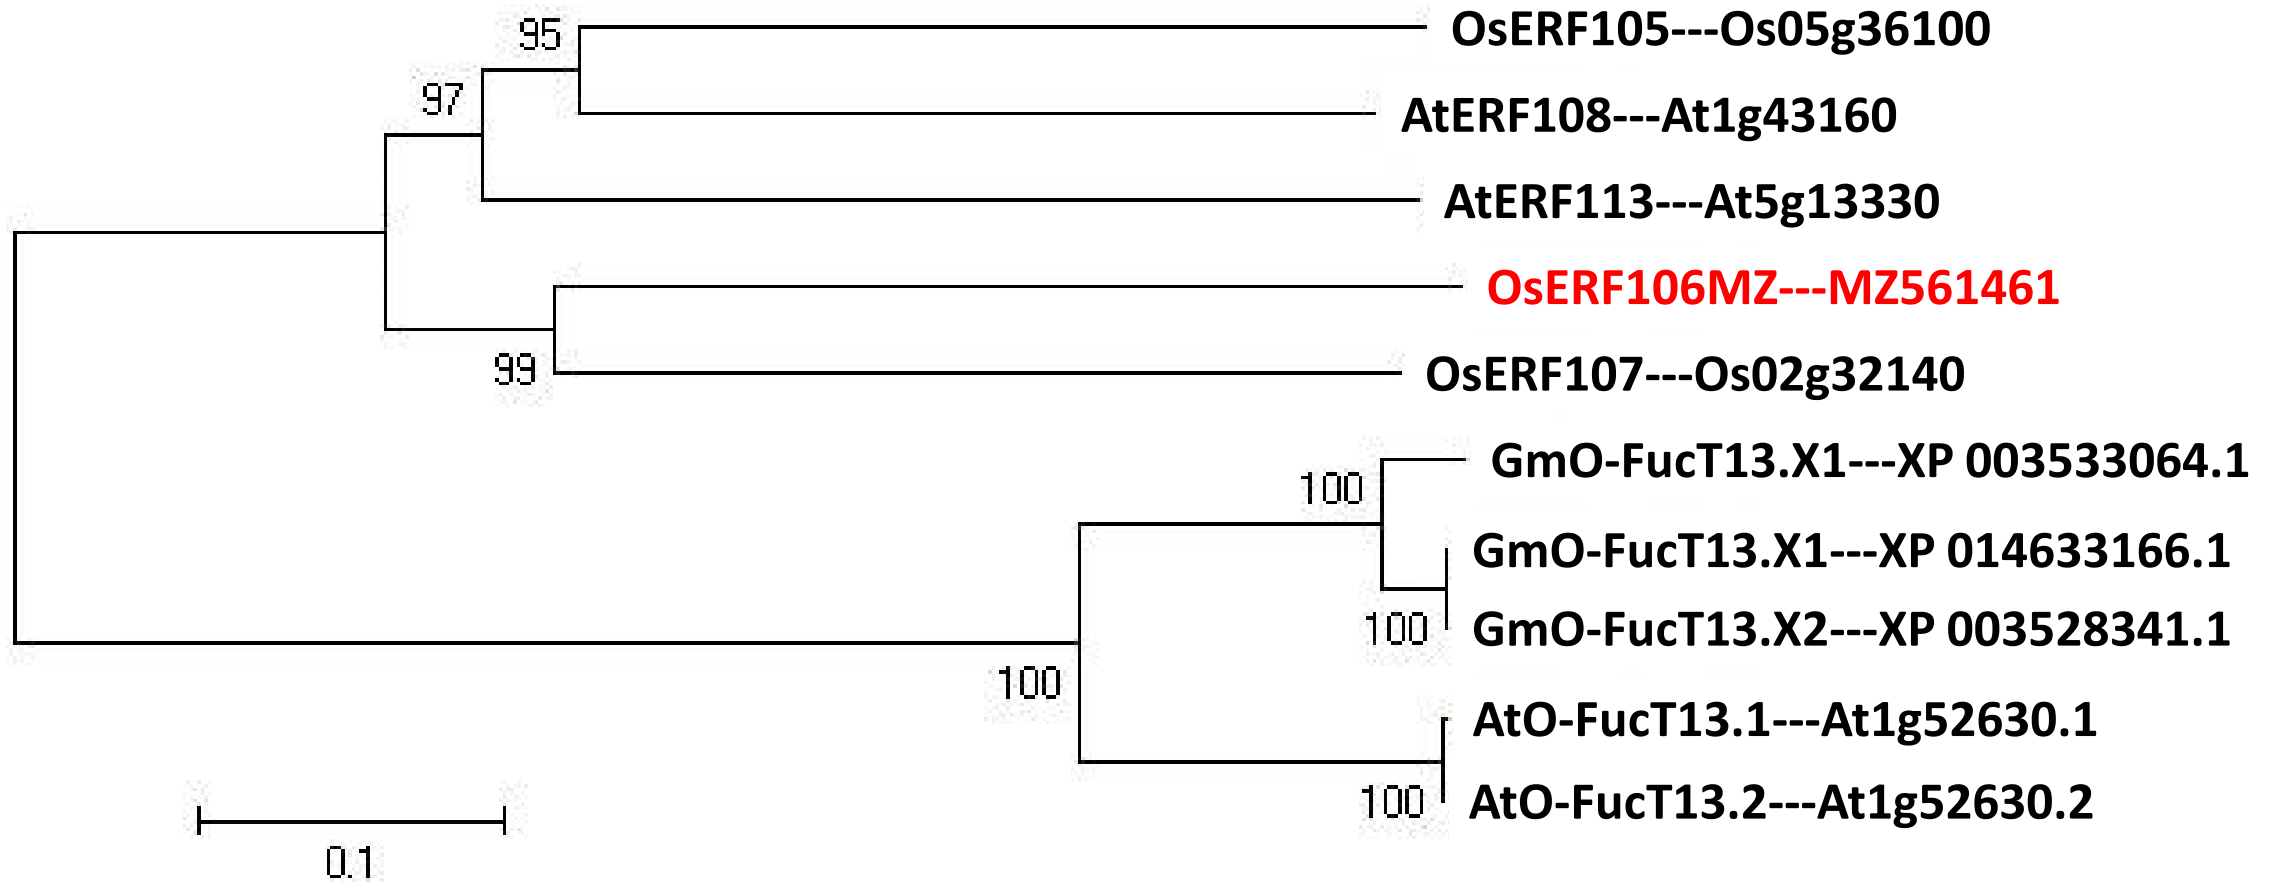

**Figure S7** Phylogenetic analysis of OsERF105, OsERF106MZ, and OsERF107 together with AtERF108, AtERF113, AtO-FucT13, and GmO-FucT13 using the neighbor-joining method. Numbers next to the descendants indicate confidence values based on the bootstrap method.

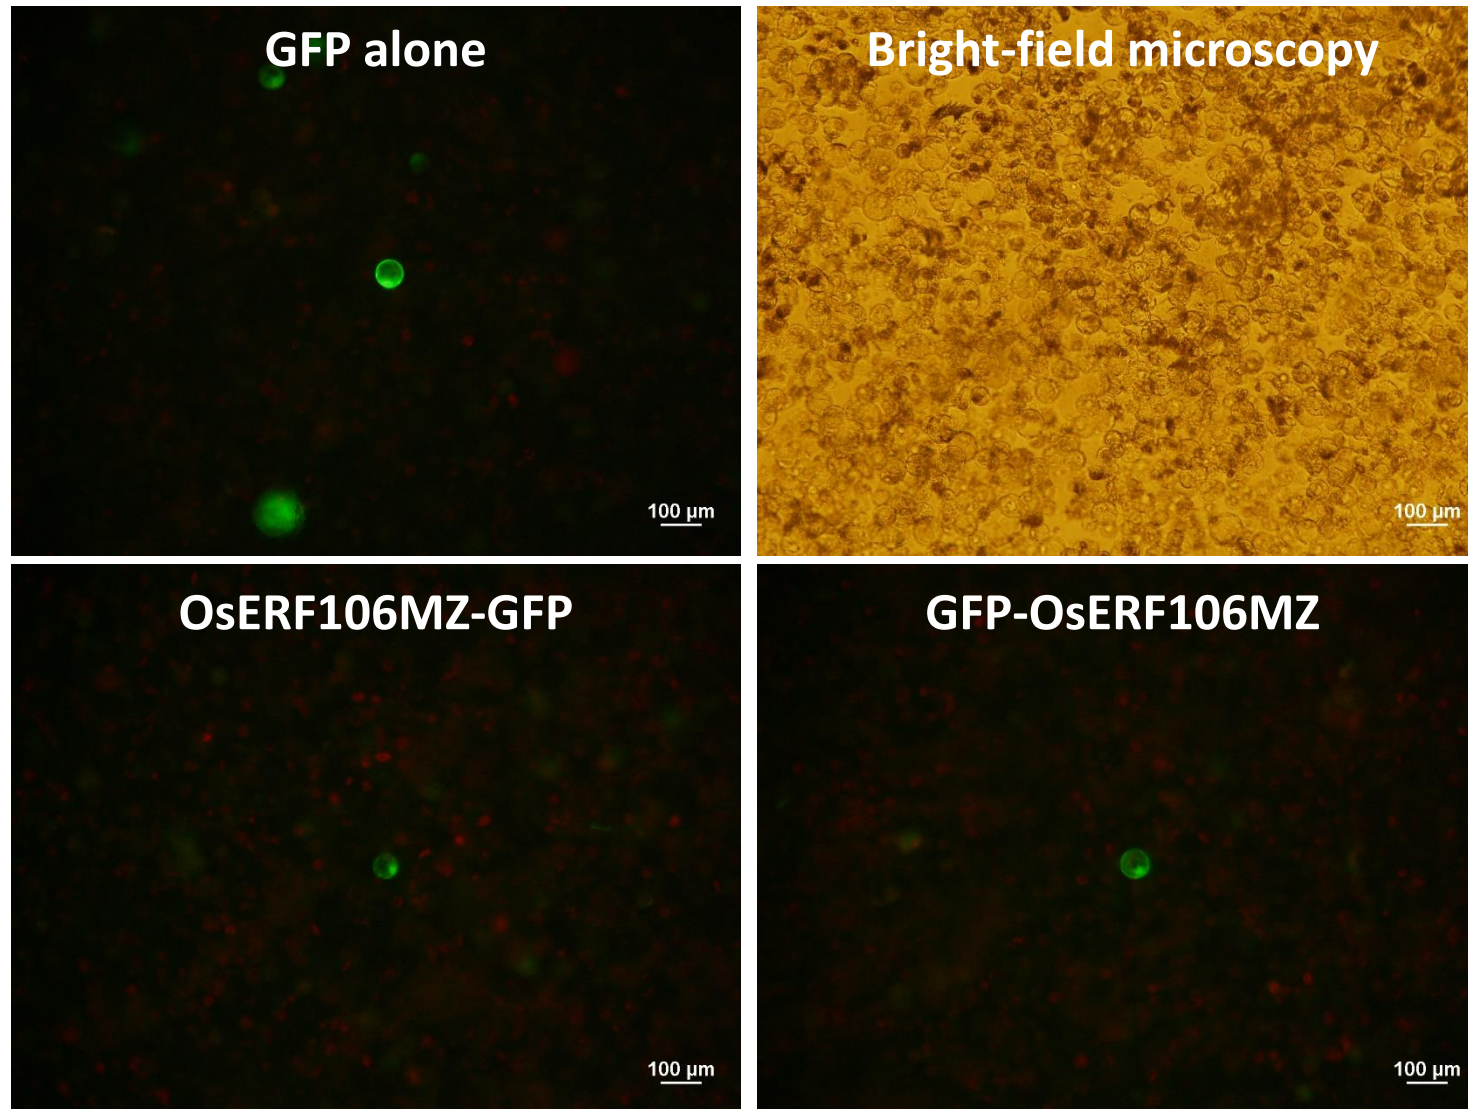

**Figure S8** The subcellular localization of OsERF106MZ-GFP and GFP-OsERF106MZ in *Oncidium* 'Sweet Sugar' suspension cells.



A

Os08g42550.2 to Os08g42550.6


 box represents a region encoding part of the O-fucosyltransferase


 box represents a region encoding the AP2/EREBP domain

Os08g42550.1

*OsERF106MZ*

B

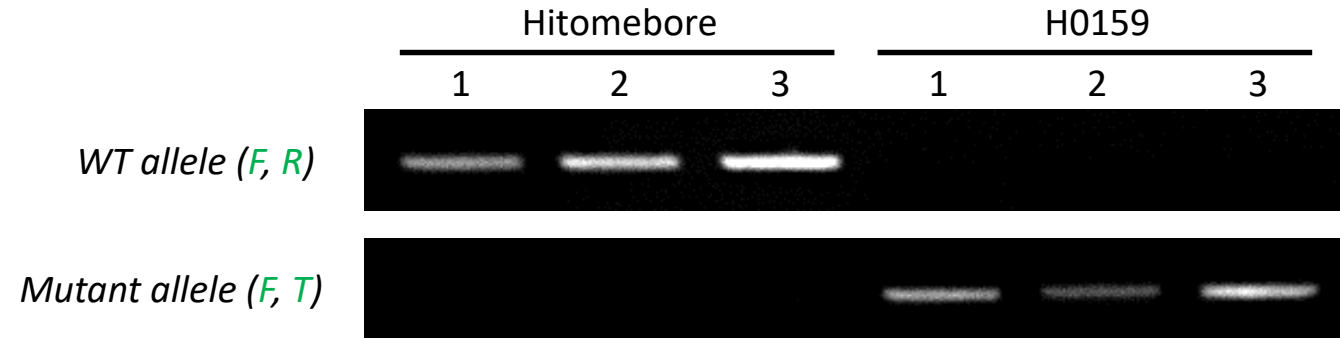

C

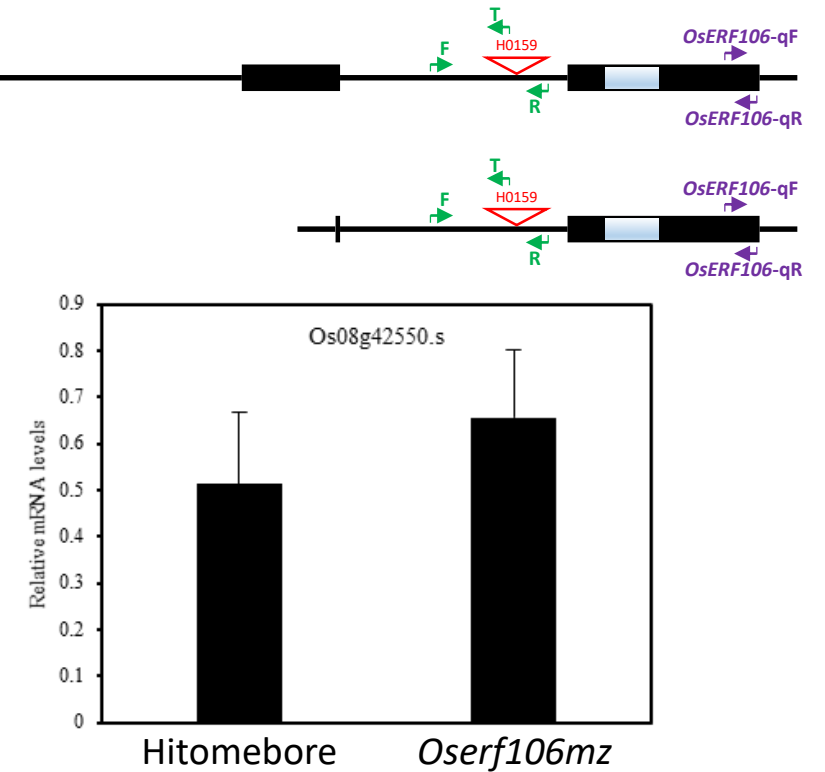

**Figure S9** Characterization of a retrotransposon insertion *Oserf106mz* mutant line, H0159. (A) A schematic diagram of the retrotransposon insertion site (indicated with a red triangle) in Os08g42550.1 and the *OsERF106MZ* gene. (B) Identification of homozygous H0159 lines by genomic DNA genotyping. The Arabic numerals represent the individual rice plants within each genotype. (C) Quantification of Os08g42550.s mRNA levels in Hitomebore and *Oserf106mz* plants by qPCR. The values are the mean  $\pm$  SE of five biological replicates, each with two technical replicates. The positions of the primers used for genotyping (B) and qPCR (C) are indicated by green and blue arrows, respectively, in (A). The primer sequences are listed in Additional file 2: Table S1. The seedlings were grown on basal medium for 11 days and then subjected to genotyping and qPCR assays.

(A)

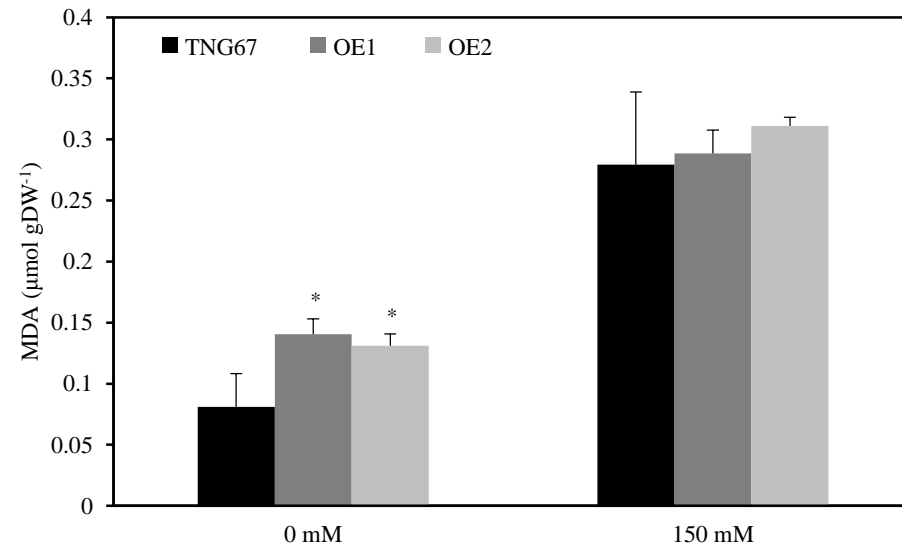

(B)

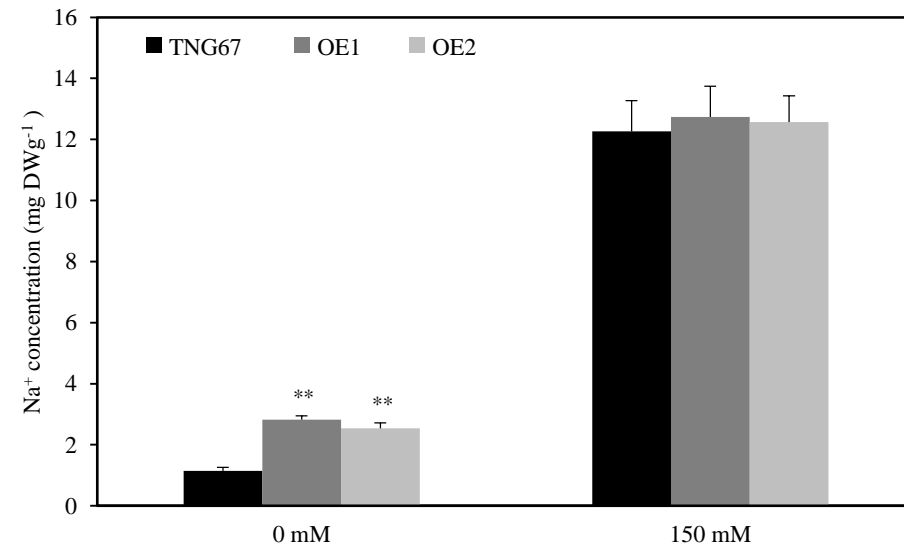

**Figure S10** MDA (left panel) and  $\text{Na}^+$  (right panel) contents in the roots of Tainung 67 and OsERF106MZ-overexpressing rice plants.

# Biological process

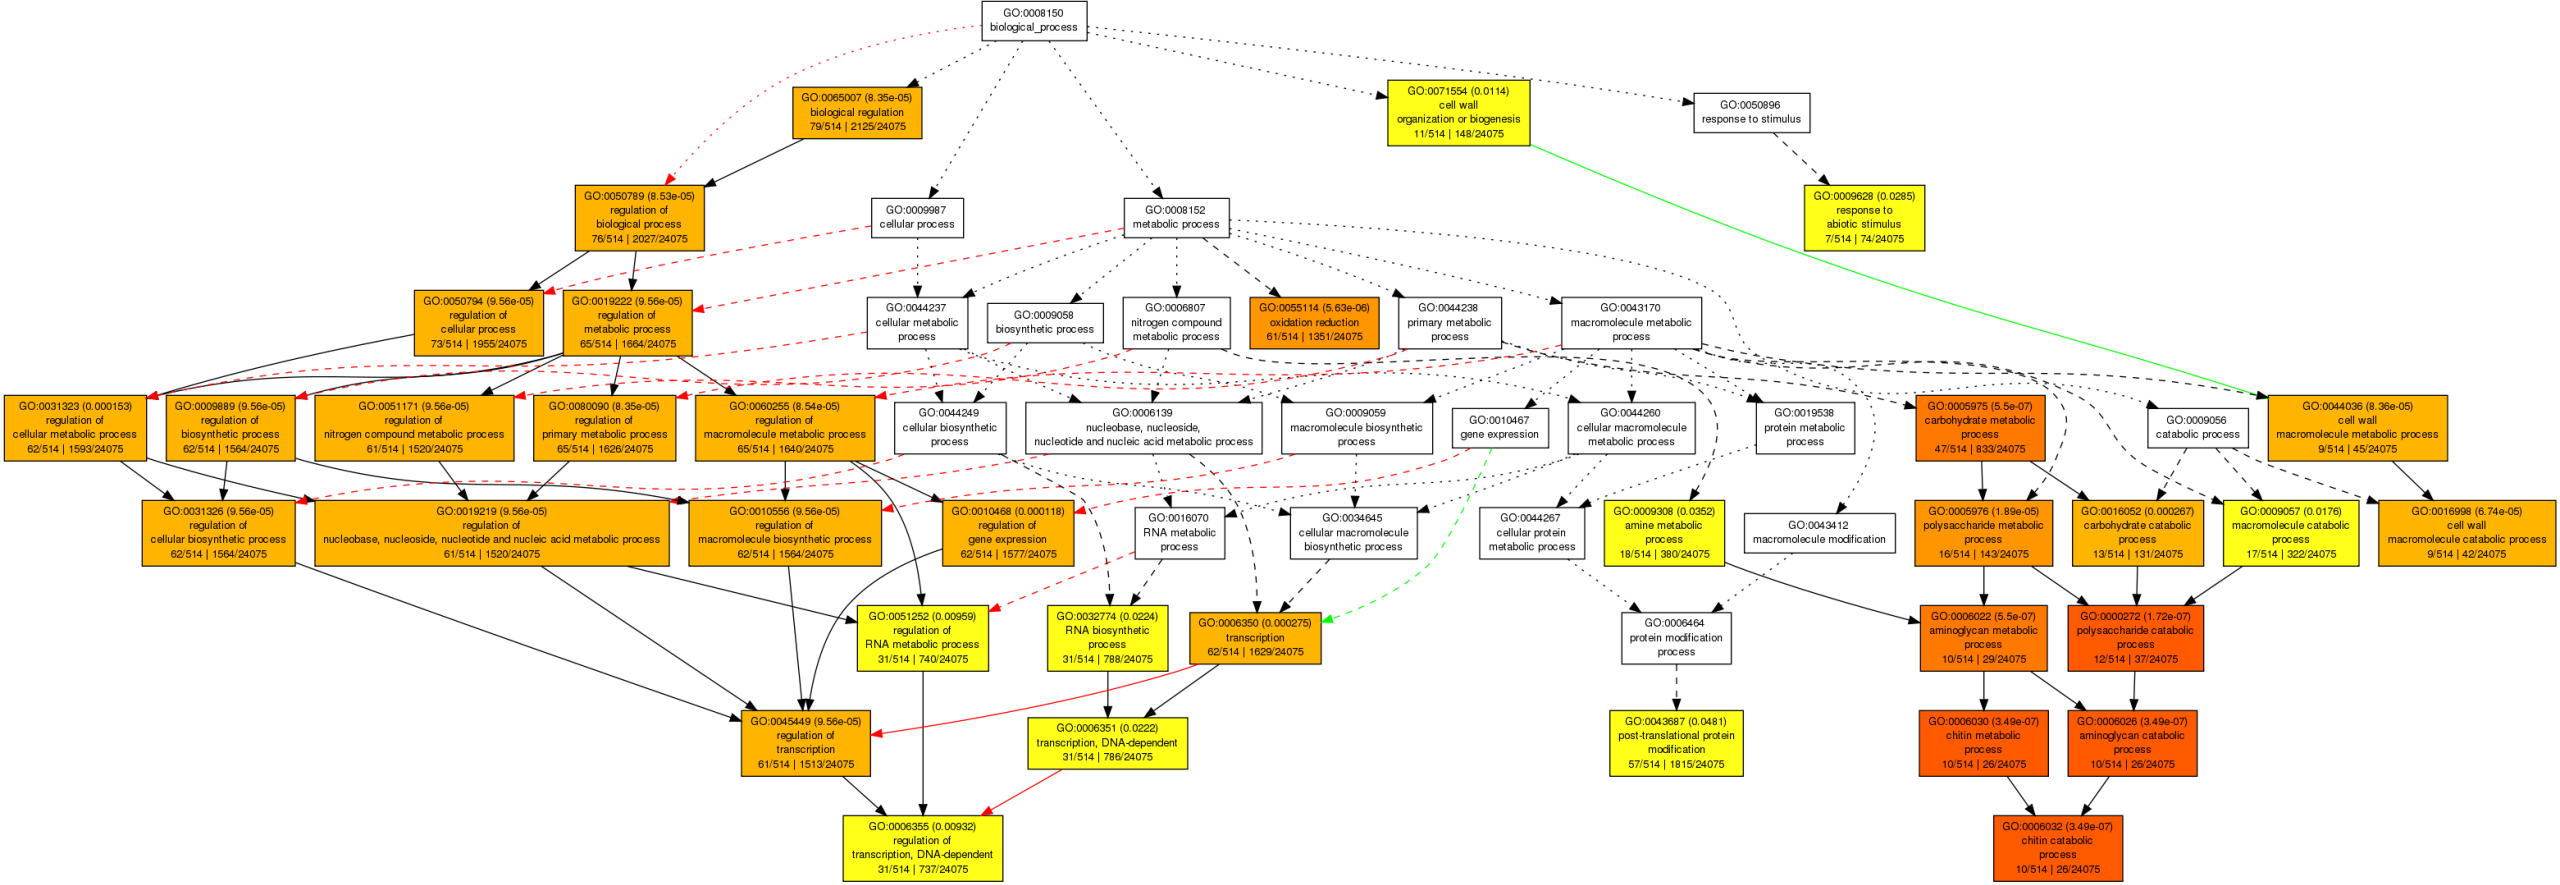

Figure S11 GO analysis of the common DEGs according to biological processes and molecular functions.

continued

# Molecular function

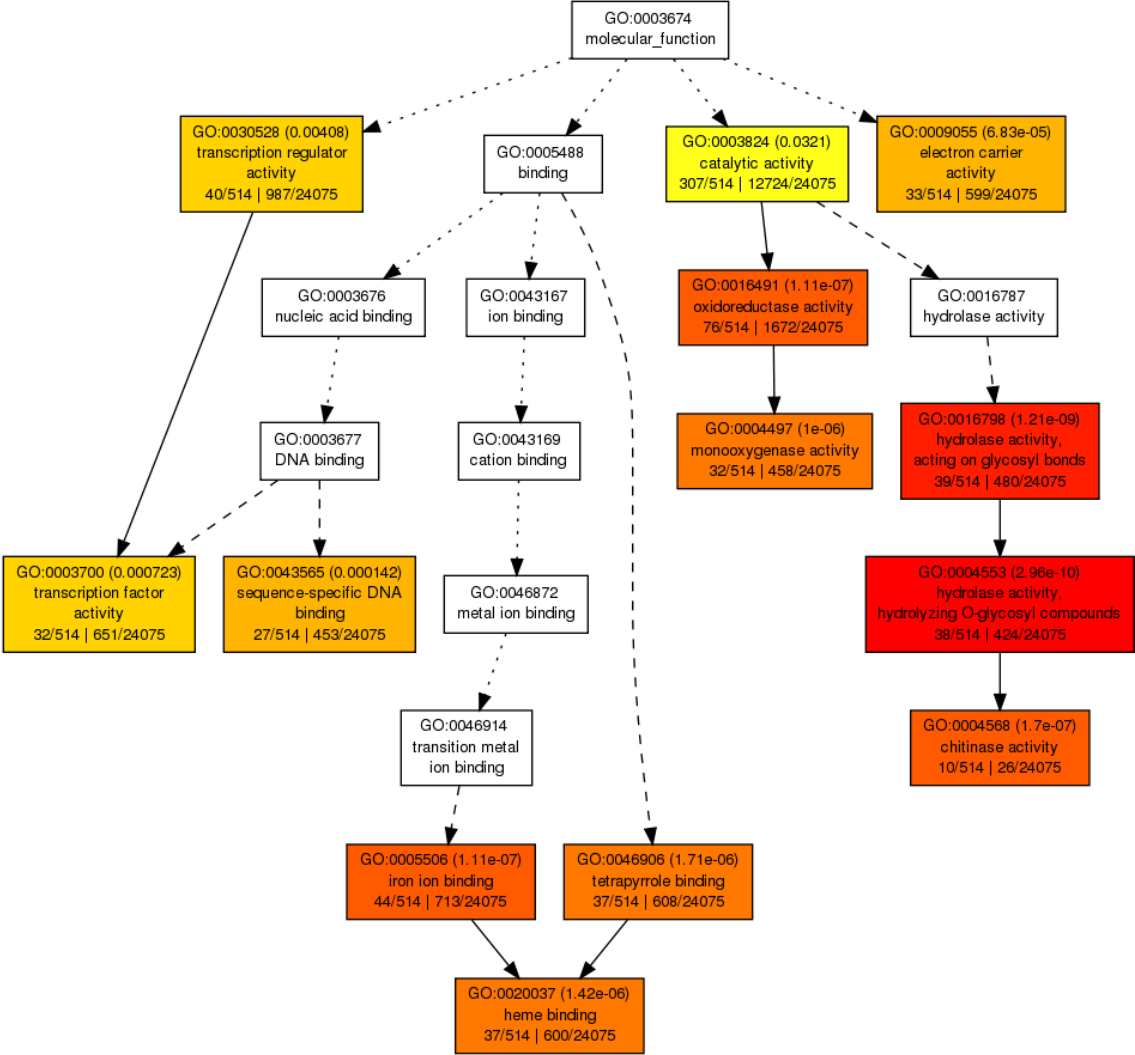

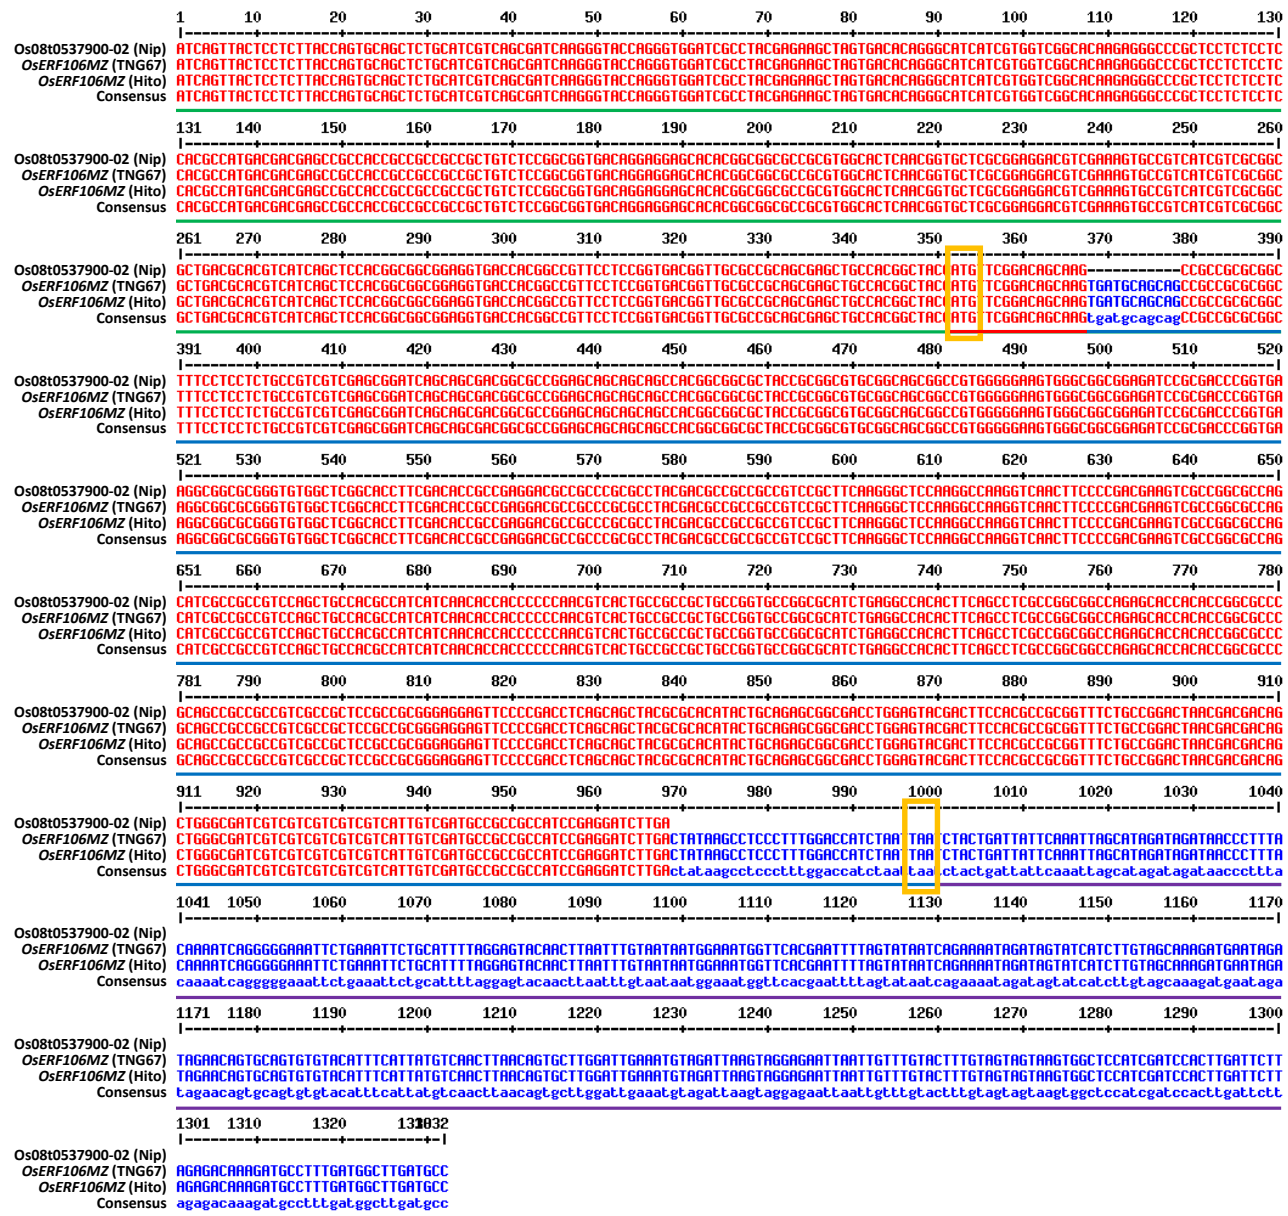

**Figure S12** Comparison between the coding sequence of *Os08t0537900-02* and the cDNA sequence of *OsERF106MZ* gene from both the TNG67 and Hitomebore (Hito) backgrounds. The 5' UTR, exon 1, exon 2, and 3' UTR within the cDNA sequence of *OsERF106MZ* gene are underlined in green, red, blue, and purple, respectively. The ATG-start and TAA-stop codons of *OsERF106MZ* gene are indicated by yellow boxes.

### OsERF105

#### cNLS Mapper Result

| Predicted NLSs in query sequence                  |     |
|---------------------------------------------------|-----|
| MADQRRFRGGGDWQASVDDVDDGGLEAAAAAAAAARGSVLSGEYQAQEM | 50  |
| STMVSALTWVAAGHDDHGGQNSGLVDVPATTLAGGGGDYGHGAQGSY   | 100 |
| YYYGAAPTSTPEFVAGGQQLSSDVPQGGASLGLAMDEHSPTYTVEASS  | 150 |
| SADQHGGGGRRYRQVGRPWGKAAEIRDPHKAARVNLGTFETAEEAA    | 200 |
| RAYDEAALRFRGSRAKLNFPEDARLSSPPAGAGAGGATAAAQTPVAYPA | 250 |
| SAVSDYLQYQMLLHGGGGGGRRPLYGGGAAAAMSSSLGYPSSIPTSS   | 300 |
| VTVASVPSSSAASSSSYGAPAEHGEAVQWTSWPDGGGWTYPATTSSWS  | 350 |
| GSSQYPPPPRPQQ                                     | 364 |

| Predicted monopartite NLS |          |       |
|---------------------------|----------|-------|
| Pos.                      | Sequence | Score |
|                           |          |       |

| Predicted bipartite NLS |          |       |
|-------------------------|----------|-------|
| Pos.                    | Sequence | Score |
|                         |          |       |

### OsERF106MZ

#### cNLS Mapper Result

| Predicted NLSs in query sequence                   |     |
|----------------------------------------------------|-----|
| MFGQQVMQPPRGGFPLPSSSGSAATAPEQQPRRRYRQVGRPWGKAA     | 50  |
| EIRDPVKAARVNLGTFDTAEADAARAYDAAAVRFKGSKAKVNFDEVAGAS | 100 |
| IAAVQLPRHHQHPPTSLPLPVAHLRPHFSLAGGQSTTPAPAAAAVAA    | 150 |
| PPREFFPDLSSYAHILQSGDLEYDFHAAVSAAGTTTAGRSSSSSSLSMPP | 200 |
| PSEDLDYKPPFGPSN                                    | 215 |

| Predicted monopartite NLS |          |       |
|---------------------------|----------|-------|
| Pos.                      | Sequence | Score |
|                           |          |       |

| Predicted bipartite NLS |          |       |
|-------------------------|----------|-------|
| Pos.                    | Sequence | Score |
|                         |          |       |

### OsERF107

#### cNLS Mapper Result

| Predicted NLSs in query sequence                  |     |
|---------------------------------------------------|-----|
| MSSRQPIGSGGGAPPDWHVDPQWQVDDVVTAAAAAYLAAPAGATLS    | 50  |
| SESADRRWRPVGPSAAAAAALQAVEAQAAAAERHYRGVRRRPWGKAA   | 100 |
| EIRDPNKAARVNLGTFDTAEAAAAAYDAAALRFKAKAKLNFPERVRGRT | 150 |
| GQGGFLVSPAVRPPPHGVPAPAVAPAPFPDLIYARLLRSGEDAAAA    | 200 |
| AAVAGIAATAAPAAQILDFAAQLVGVSPAMAPRPPSTLPTTTAAASSPS | 250 |
| AWPHGGGHGS                                        | 260 |

| Predicted monopartite NLS |          |       |
|---------------------------|----------|-------|
| Pos.                      | Sequence | Score |
|                           |          |       |

| Predicted bipartite NLS |          |       |
|-------------------------|----------|-------|
| Pos.                    | Sequence | Score |
|                         |          |       |

### OsbHLH068

#### cNLS Mapper Result

| Predicted NLSs in query sequence                            |     |
|-------------------------------------------------------------|-----|
| MGDHQMMHAAPAAMYNGGGTTSSHGVMNSNAVGVPAATCSTTTELAGY            | 50  |
| TAWSSALAAGYDGMVADNGGKQAKSTTTASSESPGNNSVTFQEPASIPD           | 100 |
| PAAVAAPVQPLAGFTDWTQPFMNNAGLHEFLQDGHDMSSSLMNHSS              | 150 |
| NNLALQAGHHHELLSSFGDLLLSPSPYGGFQSSLLRSLMEPTAKQQQ             | 200 |
| QQPALAGLQYHYQQQMHGAPAAAAKFAQVAGARDSLQFTNDAPFWNPS            | 250 |
| AGFGMPAAVAVAAAAQDQASVRSKRSSPAPRAAATLAKTAMEGVD               | 300 |
| SSSVITKKE <b>TAFKKPRLE</b> TPSPLPTFKVRKEKLGDRITALQQLVSPFGKT | 350 |
| DTASVLHETIEYIKFLHQVQGALSAPYLKNGAHQVPHLKNSSPDKSKHGE          | 400 |
| ISLKRGLCLVPISSTFVAVSEVPVELWTFGANFIR                         | 437 |

| Predicted monopartite NLS |           |       |
|---------------------------|-----------|-------|
| Pos.                      | Sequence  | Score |
| 310                       | TAFKKPRLE | 7.5   |

| Predicted bipartite NLS |          |       |
|-------------------------|----------|-------|
| Pos.                    | Sequence | Score |
|                         |          |       |

**Figure S13** Nuclear localization signal (NLS) prediction in OsERF106MZ as well as its homologs OsERF105 and OsERF107. The data were analyzed with NLS Mapper (<http://nls-mapper.iab.keio.ac.jp/>). OsbHLH068 is a nuclear-localized protein that has been documented in a previous study (Chen et al. 2017) and is used as a positive control.

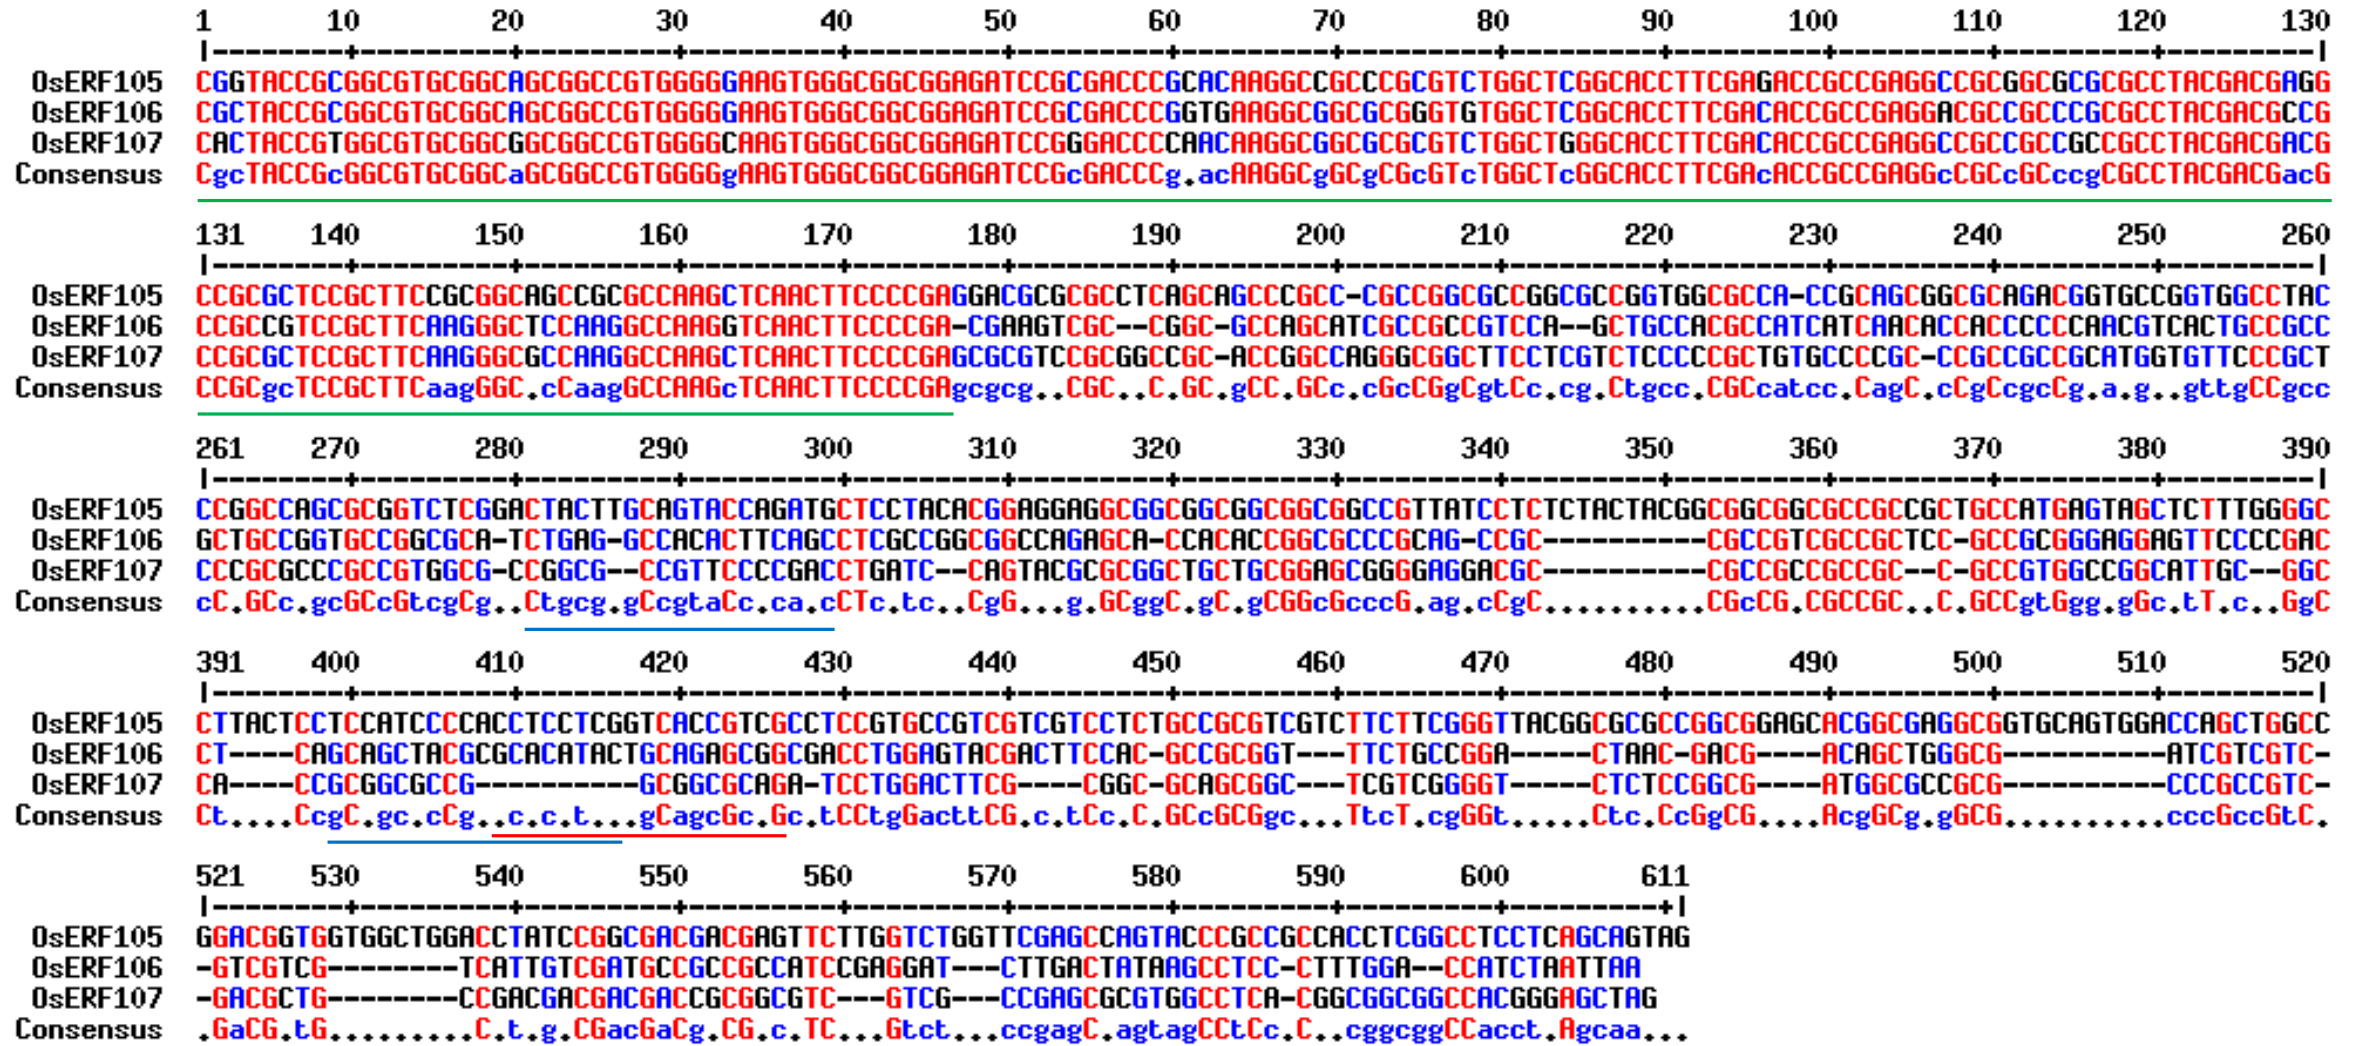

**Figure S14** Nucleotide sequence alignment of *OsERF105* (Os05g36100), *OsERF106* (Os08g42550.1), and *OsERF107* (Os02g32140), three genes belonging to the rice ERF-Xc subgroup, from the region encoding the AP2/EREbp domain (underlined in green) to the translation stop site. The positions of the *OsERF106* gene-specific primers (GSPs) used in 5' and 3' RACE experiments are underlined in red and blue, respectively.
