# Supplementary material for: Overexpression of a Novel ERF-X-Type Transcription Factor, OsERF106MZ, Reduces Shoot Growth and Tolerance to Salinity Stress in Rice
Source: PubMed Central journal article supplement (PMC8452809; doi:10.1186/s12284-021-00525-5), 2021-09-20
Supplement: 12284_2021_525_MOESM2_ESM.pdf [file 12284_2021_525_MOESM2_ESM.pdf]

**Table S1** Primers used in this study.

| PCR Type           | Gene            | Sequence (5'-3')            | Annotation    |
|--------------------|-----------------|-----------------------------|---------------|
| 5' RACE            | <i>OsERF106</i> | GTCAAGATCCTCGGATGG          | 5' GSP        |
|                    | Os08g42550      | CCGCTCTGCAGTATGTGC          | 5' Nested GSP |
| 3' RACE            | <i>OsERF106</i> | CTGAGGCCACACTTCAGC          | 3' GSP        |
|                    | Os08g42550      | GCAGCTACGCGCACATAC          | 3' Nested GSP |
| gDNA<br>genotyping | <i>OsERF106</i> | TCAACTTTGGGACAAAAGGG (F)    | 397 bp (F, R) |
|                    | Os08g42550      | CTGATACCATCTTAACTAATTGC (T) |               |
|                    |                 | CACACGGCAAAATTGAGGTA (R)    | 428 bp (F, T) |
|                    |                 | GGTTTCTGCCGACTAACGA         |               |
|                    | <i>OsERF106</i> | ( <i>OsERF106</i> -qF)      | 108 bp        |
|                    | Os08g42550      | GATGGTCCAAAGGGAGGCTT        |               |
|                    |                 | ( <i>OsERF106</i> -qR)      |               |
|                    |                 | GCAACAATGGTTCTGCCCAA        |               |
|                    | <i>O-FucT</i>   | ( <i>O-FucT</i> -qF)        | 72 bp         |
|                    |                 | TCGAAAACGTCTGCAAATCCA       |               |
|                    |                 | ( <i>O-FucT</i> -qG)        |               |
| qPCR               | <i>OsSOS1</i>   | CTCCGTGCTCATAGAATCGC        | 207 bp        |
|                    | Os12g44360      | ATACTCACTCAAGTGGGTCAATACC   |               |
|                    | <i>OsHKT1.1</i> | ATTAGCAGAGCACTGTGGAGGAA     | 245 bp        |
|                    | Os04g51820      | CCGACGAACCCGTAGGAAG         |               |
|                    | <i>OsHKT1.3</i> | CAGTTCATCTACCAAAACAATCCA    | 251 bp        |
|                    | Os02g07830      | AATACCTCACCACCAATCAGCA      |               |
|                    | <i>OsAKT1</i>   | TACGACCGCCGATACAGAA         | 184 bp        |
|                    | Os01g45990      | CCAAATAAGCCACAAAGAAGG       |               |

|                 |                             |        |
|-----------------|-----------------------------|--------|
| <i>OsABI5</i>   | TCACAGGAGCGTGACCAAAG        | 128 bp |
| Os01g64000      | CCTGGCTCACACAAGGAGTT        |        |
| <i>OsHOK24</i>  | TACGAGTACGACCATCACCTAGACTAC | 90 bp  |
| Os02g43330      | TGGCCATATCTCCCACAGATC       |        |
| <i>OsMAIF1</i>  | GAAGCGGGATTGCGTCTACT        | 104 bp |
| Os02g44990      | TATCGACCTCTCCGGTCTCC        |        |
| <i>OsSRO1c</i>  | TCCCTATGCTTCTGACGGAGAT      | 76 bp  |
| Os01g45990      | CAGTTGTACGTCCTCTGCAAAGTC    |        |
| <i>OsNAC006</i> | CGAGGAGGTTGGTATAAGTGGTGA    | 170 bp |
| Os01g09550      | TATTTGATACAGGGTTCGTCCGGC    |        |
| <i>OsActin1</i> | CTCAGCACATTCCAGCAGATGTG     | 126 bp |
| Os03g50885      | GATAACAGCTCCTCTTGGCTTAGC    |        |
